# Supplementary material
Source: Springer Nature journal article supplement (http://www.springermedizin.de/resource/supplementary/13023_2012_540_MOESM4_ESM.pdf/9642698)

### Hand Held Dynamometry -Average Course -

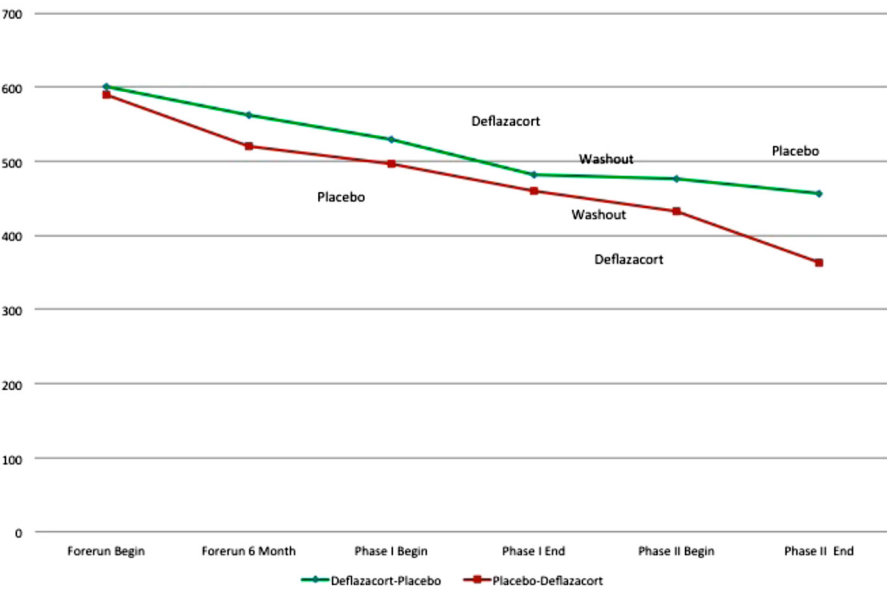

b

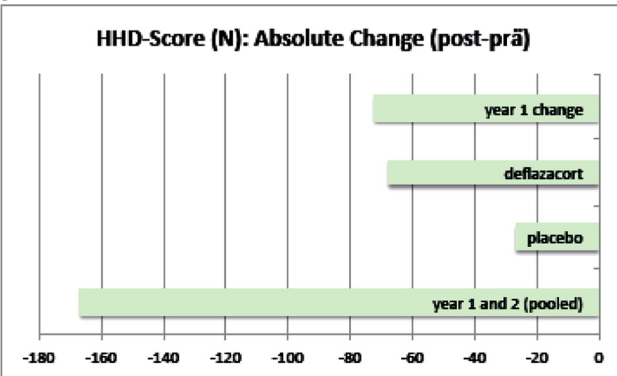

c

### Hand Held Dynamometry -Average Course-

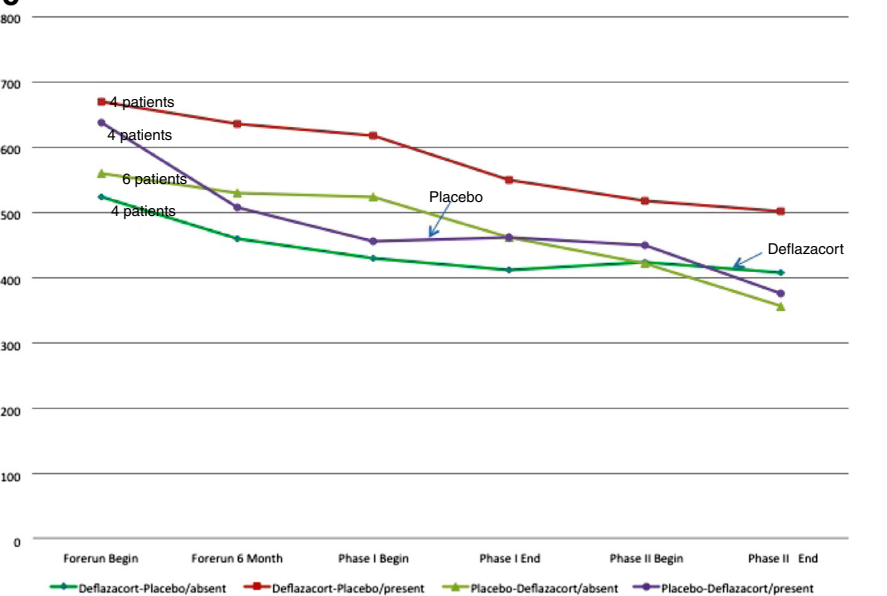

Supplement: MOESM4 [file 9642698]
